# Supplementary material for: Prevalence of ECGs Exceeding Thresholds for ST‐Segment–Elevation Myocardial Infarction in Apparently Healthy Individuals: The Role of Ethnicity
Source: PubMed Central journal article supplement — J Am Heart Assoc. 2020 Jun 23;9(13):e015477. doi: 10.1161/JAHA.119.015477 (PMC7670498; doi:10.1161/jaha.119.015477), 2020-06-23
Supplement: JAH3-9-e015477-s001.pdf [file JAH3-9-e015477-s001.pdf]

# **SUPPLEMENTAL MATERIAL**

**Table S1. Prevalence of high QRS-voltage ECGs.**

| Prevalence %<br>(95% CI)                                   | Apparently healthy<br>population<br>N = 10,783 | Ghanaian,<br>males, <40 y<br>n = 120 | Turkish,<br>females, ≥40 y<br>n = 417 |
|------------------------------------------------------------|------------------------------------------------|--------------------------------------|---------------------------------------|
| Original Sokolow-Lyon<br>index (A)                         | 4.49%<br>(4.10%-4.88%)                         | 36.67%<br>(28.04%-45.29%)            | 0.48%<br>(-0.18%-1.14%)               |
| Original Sokolow-Lyon<br>index without V6 (B)              | 4.45%<br>(4.06%-4.84%)                         | 36.67%<br>(28.04%-45.29%)            | 0.48%<br>(-0.18%-1.14%)               |
| Modified Sokolow-Lyon<br>index (B)                         | 20.11%<br>(19.36%-20.87%)                      | 82.50%<br>(75.70%-89.30%)            | 0.72%<br>(-0.09%-01.53%)              |
| Cornell voltage (A)                                        | 1.39%<br>(1.17%-1.61%)                         | 1.67%<br>(-0.62%-3.96%)              | 0.48%<br>(-0.18%-1.14%)               |
| Cornell voltage duration<br>product (B)                    | 2.48%<br>(2.18%-2.77%)                         | 4.17%<br>(0.59%-7.74%)               | 0.96%<br>(0.02%-1.89%)                |
| R aVL (A,B)                                                | 0.76%<br>(0.60%-0.92%)                         | 2.50%<br>(-0.29%-5.29%)              | 0.48%<br>(-0.18%-1.14%)               |
| ESC hypertension guideline<br>2013: any of B               | 21.83%<br>(21.05%-22.61%)                      | 83.33%<br>(76.67%-90.00%)            | 2.16%<br>(0.76%-3.55%)                |
| High QRS-voltage criteria<br>used for this study: any of A | 6.33%<br>(5.87%-6.79%)                         | 38.33%<br>(29.63%-47.03%)            | 1.44%<br>(0.30%-2.58%)                |

Prevalences of ECGs meeting one of the high QRS-voltage criteria in the apparently healthy population and the on age-, sex- and ethnicity based subgroups with respectively the highest and lowest prevalence of electrocardiographic LVH according to the criteria from the ESC hypertension guideline. Original Sokolow-Lyon index:  $S V_1 + R V_5/V_6 > 3.5\text{mV}$ ; Original Sokolow-Lyon index without V6:  $S V_1 + R V_5 > 3.5\text{mV}$ ; Modified Sokolow-Lyon index: any precordial S + any precordial R  $> 3.5\text{mV}$ . Cornell voltage:  $R aVL + S V_3 > 2.8\text{mV}$  (males),  $2.0\text{mV}$  (females); Cornell voltage duration product:  $(R aVL + S V_3 \text{ (females} + 0.8\text{mV)}) \cdot \text{QRS-duration} > 244\text{mV}\cdot\text{ms}$ ;  $R aVL > 1.1\text{mV}$ .  
y=years old.

**Table S2. STE-ECG prevalence in the larger HELIUS population.**

| Prevalence %<br>(95% CI)                  | <b>Apparently healthy<br/>population</b><br>N=10,783<br>Age: 38 (28-48)[18-71]<br>Sex (M/F): 4,079/6,704 | <b>CVD-free population</b><br>N=16,610<br>Age: 44 (32-53)[18-73]<br>Sex (M/F): 6,643/9,967 | <b>Total HELIUS cohort</b><br>N=20,789<br>Age: 45 (34-54)[18-73]<br>Sex (M/F): 8,647/12,142 |
|-------------------------------------------|----------------------------------------------------------------------------------------------------------|--------------------------------------------------------------------------------------------|---------------------------------------------------------------------------------------------|
| Sex-specific<br>STEMI thresholds          | 3.43%<br>(3.10%-3.79%)                                                                                   | 3.05%<br>(2.80%-3.33%)                                                                     | 2.95%<br>(2.73%-3.19%)                                                                      |
| Age- and sex-specific<br>STEMI thresholds | 2.76%<br>(2.47%-3.09%)                                                                                   | 2.52%<br>(2.29%-2.77%)                                                                     | 2.46%<br>(2.26%-2.68%)                                                                      |

Prevalences of STE-ECGs in the larger HELIUS population next to the apparently healthy subjects additionally including subjects with hypertension, CKD and/or diabetes (CVD-free population) and the total HELIUS cohort additionally including subjects with cardiovascular disease (see Figure 1).

CVD-free = without cardiovascular disease

**Table S3. Logistic regression for the occurrence of a STE-ECG.**

|                               |                                              | <b>Odds ratio (95% CI)</b> | <b>p-value</b> |
|-------------------------------|----------------------------------------------|----------------------------|----------------|
| <b>Ethnicity:</b>             |                                              |                            |                |
|                               | Ghanaian                                     | 5.71 (3.25-10.02)          | <0.0001*       |
|                               | African Surinamese                           | 4.49 (2.66-7.57)           | <0.0001*       |
|                               | Dutch                                        | 2.18 (1.29-3.68)           | 0.0037         |
|                               | Moroccan                                     | 2.12 (1.24-3.61)           | 0.0057         |
|                               | South-Asian Surinamese                       | 1.79 (0.97-3.30)           | 0.0619         |
|                               | Turkish                                      | reference                  |                |
| <b>Sex:</b>                   |                                              |                            |                |
|                               | Male                                         | 4.06 (2.79-5.90)           | <0.0001*       |
|                               | Female                                       | reference                  |                |
| <b>Age:</b>                   |                                              |                            |                |
|                               | Years                                        | 0.97 (0.96-0.98)           | <0.0001*       |
| <b>High QRS-voltage:</b>      |                                              |                            |                |
|                               | High QRS-voltages                            | 2.80 (2.08-3.76)           | <0.0001*       |
|                               | No high QRS-voltages                         | reference                  |                |
| <b>ERP:</b>                   |                                              |                            |                |
|                               | Inferior and antero-lateral (n = 532)        | 4.06 (2.85-5.80)           | <0.0001*       |
|                               | Antero-lateral (n = 478)                     | 3.16 (2.11-4.72)           | <0.0001*       |
|                               | Lateral (n = 304)                            | 2.80 (1.49-5.26)           | 0.0014         |
|                               | Lateral and antero-lateral (n = 65)          | 1.33 (0.44-4.00)           | 0.6089         |
|                               | Lateral, inferior and antero-lateral (n = 7) | 0.00 (0.00-INF)            | 0.9791         |
|                               | Inferior (n = 1,166)                         | 1.08 (0.70-1.68)           | 0.7196         |
|                               | Lateral and inferior (n = 3)                 | 0.00 (0.00-INF)            | 0.9887         |
|                               | No early repolarization pattern              | reference                  |                |
| <b>QRS-duration:</b>          |                                              |                            |                |
|                               | milliseconds, IQR: 14 ms                     | 1.06 (1.05-1.08)           | <0.0001*       |
| <b>QTc-interval (Bazett):</b> |                                              |                            |                |
|                               | milliseconds, IQR: 28 ms                     | 0.98 (0.97-0.99)           | <0.0001*       |

The reference category for the categorical variables was the subgroup with the lowest prevalence of a STE-ECG (age- and sex-specific STEMI thresholds): Turkish ethnicity, female, no high QRS-voltages, no ERP.

\* = significant with a significance level of 0.001; IQR = interquartile range.

**Table S4. Exclusions stratified per ethnicity.**

| n (%)                           | All              | Afr.<br>Sur.   | Dutch          | Ghan.          | Moroc.         | S.-Asian<br>Sur. | Turkish        |
|---------------------------------|------------------|----------------|----------------|----------------|----------------|------------------|----------------|
| <b>Initial inclusion</b>        | 21,240<br>(100%) | 4,060<br>(19%) | 4,477<br>(21%) | 2,309<br>(11%) | 3,860<br>(18%) | 2,981<br>(14%)   | 3,553<br>(17%) |
| Exclusion for STE-ECG analysis: |                  |                |                |                |                |                  |                |
| Pre-excitation                  | 44               | 8              | 5              | 5              | 9              | 10               | 7              |
| QRS $\geq$ 120ms                | 392              | 53             | 132            | 25             | 65             | 52               | 65             |
| Ventricular rhythm/pacing       | 15               | 3              | 3              | 2              | 2              | 4                | 1              |
| <b>None of above:</b>           | 20,789<br>(100%) | 3,996<br>(19%) | 4,337<br>(21%) | 2,277<br>(11%) | 3,784<br>(18%) | 2,915<br>(14%)   | 3,480<br>(17%) |
| Cardiovascular exclusion:       |                  |                |                |                |                |                  |                |
| Arterial disease*               | 1,448            | 310            | 239            | 126            | 152            | 346              | 275            |
| ECG abnormalities*              | 2,071            | 446            | 409            | 231            | 282            | 353              | 350            |
| ECG-mod. medication*            | 1,353            | 211            | 337            | 79             | 220            | 214              | 292            |
| <b>None of above:</b>           | 16,610<br>(100%) | 3,178<br>(19%) | 3,479<br>(21%) | 1,882<br>(11%) | 3,202<br>(19%) | 2,167<br>(13%)   | 2,702<br>(16%) |
| Comorbidity exclusion:          |                  |                |                |                |                |                  |                |
| CKD*                            | 22               | 7              | 1              | 1              | 3              | 6                | 4              |
| DM*                             | 1,577            | 357            | 85             | 230            | 326            | 340              | 239            |
| Hypertension*                   | 5,308            | 1,430          | 850            | 966            | 672            | 736              | 654            |
| <b>None of above:</b>           | 10,783           | 1,660          | 2,603          | 870            | 2,384          | 1,318            | 1,948          |
| Apparently healthy population   | (100%)           | (15%)          | (24%)          | (8%)           | (22%)          | (12%)            | (18%)          |

S.-Asian Sur.=South-Asian Surinamese, Afr. Sur.=African Surinamese, Ghan.=Ghanaian, Moroc.=Moroccan, ECG-mod. med.=ECG-modulating medication, \*=Categories may overlap.

**Table S5. STE-ECG prevalence stratified per ethnicity, sex and age.**

| Prevalence (95% CI) | All                                | Afr. Sur.                          | Dutch                             | Ghan.                              | Moroc.                            | S.-Asian Sur.                     | Turkish                           |
|---------------------|------------------------------------|------------------------------------|-----------------------------------|------------------------------------|-----------------------------------|-----------------------------------|-----------------------------------|
| <b>All</b>          | 2.76%<br>(2.47%-3.09%)<br>N=10,783 | 4.76%<br>(3.84%-5.89%)<br>n=1,660  | 2.31%<br>(1.79%-2.96%)<br>n=2,603 | 7.01%<br>(5.50%-8.90%)<br>n=870    | 2.18%<br>(1.67%-2.85%)<br>n=2,384 | 1.90%<br>(1.29%-2.79%)<br>n=1,318 | 1.08%<br>(0.71%-1.64%)<br>n=1,948 |
| <b>M</b>            | 6.15%<br>(5.46%-6.93%)<br>n=4,079  | 11.11%<br>(8.84%-13.87%)<br>n=603  | 4.66%<br>(3.53%-6.12%)<br>n=1,030 | 17.52%<br>(13.48%-22.46%)<br>n=274 | 5.70%<br>(4.30%-7.52%)<br>n=807   | 4.14%<br>(2.77%-6.13%)<br>n=556   | 2.35%<br>(1.51%-3.64%)<br>n=809   |
| <b>F</b>            | 0.70%<br>(0.53%-0.93%)<br>n=6,704  | 1.14%<br>(0.65%-1.97%)<br>n=1,057  | 0.76%<br>(0.44%-1.33%)<br>n=1,573 | 2.18%<br>(1.28%-3.70%)<br>n=596    | 0.38%<br>(0.17%-0.83%)<br>n=1,577 | 0.26%<br>(0.07%-0.95%)<br>n=762   | 0.18%<br>(0.05%-0.64%)<br>n=1,139 |
| <b>&lt;40y</b>      | 3.45%<br>(3.01%-3.95%)<br>n=5,776  | 6.36%<br>(4.82%-8.35%)<br>n=739    | 3.64%<br>(2.72%-4.85%)<br>n=1,209 | 8.01%<br>(5.81%-10.94%)<br>n=437   | 2.56%<br>(1.87%-3.49%)<br>n=1487  | 2.38%<br>(1.49%-3.79%)<br>n=713   | 1.51%<br>(0.96%-2.38%)<br>n=1,191 |
| <b>≥40y</b>         | 1.98%<br>(1.63%-2.40%)<br>n=5,007  | 3.47%<br>(2.47%-4.86%)<br>n=921    | 1.15%<br>(0.71%-1.86%)<br>n=1,394 | 6.00%<br>(4.13%-8.65%)<br>n=433    | 1.56%<br>(0.93%-2.60%)<br>n=897   | 1.32%<br>(0.67%-2.59%)<br>n=605   | 0.40%<br>(0.13%-1.16%)<br>n=757   |
| <b>M, &lt;40y</b>   | 7.71%<br>(6.65%-8.92%)<br>n=2,127  | 14.77%<br>(11.00%-19.56%)<br>n=264 | 7.20%<br>(5.22%-9.85%)<br>n=486   | 21.67%<br>(15.24%-29.85%)<br>n=120 | 6.82%<br>(4.87%-9.47%)<br>n=469   | 5.02%<br>(3.11%-7.99%)<br>n=319   | 3.41%<br>(2.11%-5.47%)<br>n=469   |
| <b>M, ≥40y</b>      | 4.46%<br>(3.63%-5.47%)<br>n=1,952  | 8.26%<br>(5.78%-11.68%)<br>n=339   | 2.39%<br>(1.40%-4.05%)<br>n=544   | 14.29%<br>(9.63%-20.68%)<br>n=154  | 4.14%<br>(2.48%-6.83%)<br>n=338   | 2.95%<br>(1.44%-5.97%)<br>n=237   | 0.88%<br>(0.30%-2.56%)<br>n=340   |
| <b>F, &lt;40y</b>   | 0.96%<br>(0.69%-1.33%)<br>n=3,649  | 1.68%<br>(0.86%-3.29%)<br>n=475    | 1.24%<br>(0.66%-2.35%)<br>n=723   | 2.84%<br>(1.50%-5.31%)<br>n=317    | 0.59%<br>(0.27%-1.28%)<br>n=1,018 | 0.25%<br>(0.01%-1.42%)<br>n=394   | 0.28%<br>(0.08%-1.00%)<br>n=722   |
| <b>F, ≥40y</b>      | 0.39%<br>(0.22%-0.69%)<br>n=3,055  | 0.69%<br>(0.27%-1.75%)<br>n=582    | 0.35%<br>(0.12%-1.03%)<br>n=850   | 1.43%<br>(0.56%-3.63%)<br>n=279    | 0.00%<br>(0.00%-0.68%)<br>n=559   | 0.27%<br>(0.01%-1.52%)<br>n=368   | 0.00%<br>(-.00%-0.91%)<br>n=417   |

Prevalences of STE-ECGs (age- and sex- specific STEMI thresholds) stratified per ethnicity, sex and age group.

**Table S6. Electrocardiographic locations of STE-ECGs stratified per ethnicity.**

| ECG lead combination                 | All                       | Afr. Sur.                 | Dutch                     | Ghan.                     | Moroc.                    | S.-Asian Sur.             | Turkish                   |
|--------------------------------------|---------------------------|---------------------------|---------------------------|---------------------------|---------------------------|---------------------------|---------------------------|
| prevalence                           | N=10,783                  | n=1,660                   | n=2,603                   | n=870                     | n=2,384                   | n=1,318                   | n=1,948                   |
| <b>aVL&amp;I</b>                     | 0.02%                     | 0.00%                     | 0.00%                     | 0.23%                     | 0.00%                     | 0.00%                     | 0.00%                     |
| <b>I&amp;-aVR</b>                    | 0.03%                     | 0.00%                     | 0.00%                     | 0.11%                     | 0.04%                     | 0.00%                     | 0.05%                     |
| <b>-aVR&amp;II</b>                   | 0.07%                     | 0.24%                     | 0.04%                     | 0.11%                     | 0.08%                     | 0.00%                     | 0.00%                     |
| <b>II&amp;aVF</b>                    | 0.18%                     | 0.30%                     | 0.23%                     | 0.23%                     | 0.08%                     | 0.15%                     | 0.10%                     |
| <b>aVF&amp;III</b>                   | 0.07%                     | 0.06%                     | 0.15%                     | 0.00%                     | 0.04%                     | 0.08%                     | 0.05%                     |
| <b>V1&amp;V2</b>                     | 0.19%                     | 0.42%                     | 0.04%                     | 0.80%                     | 0.17%                     | 0.00%                     | 0.05%                     |
| <b>V2&amp;V3</b>                     | 0.45%                     | 0.66%                     | 0.31%                     | 2.07%                     | 0.34%                     | 0.30%                     | 0.00%                     |
| <b>V3&amp;V4</b>                     | 0.93%                     | 1.99%                     | 0.65%                     | 3.45%                     | 0.46%                     | 0.46%                     | 0.15%                     |
| <b>V4&amp;V5</b>                     | 1.96%                     | 3.31%                     | 1.77%                     | 4.71%                     | 1.59%                     | 1.21%                     | 0.77%                     |
| <b>V5&amp;V6</b>                     | 0.26%                     | 0.48%                     | 0.15%                     | 0.46%                     | 0.25%                     | 0.30%                     | 0.10%                     |
| <b>STE-ECG: One or more of above</b> |                           |                           |                           |                           |                           |                           |                           |
| prevalence                           | 2.76%                     | 4.76%                     | 2.31%                     | 7.01%                     | 2.18%                     | 1.90%                     | 1.08%                     |
| (95% CI)                             | (2.47%-3.09%)             | (3.84%-5.89%)             | (1.79%-2.96%)             | (5.50%-8.90%)             | (1.67%-2.85%)             | (1.29%-2.79%)             | (0.71%-1.64%)             |
| <b>Involvement of lead V4</b>        |                           |                           |                           |                           |                           |                           |                           |
| % (95% CI)                           | 88.93%<br>(84.86%-92.01%) | 89.87%<br>(81.27%-94.78%) | 91.67%<br>(81.93%-96.39%) | 91.80%<br>(82.21%-96.45%) | 84.62%<br>(72.48%-91.99%) | 84.00%<br>(65.35%-93.60%) | 85.71%<br>(65.36%-95.02%) |

**Figure S1. Migration history of the HELIUS ethnicities.**

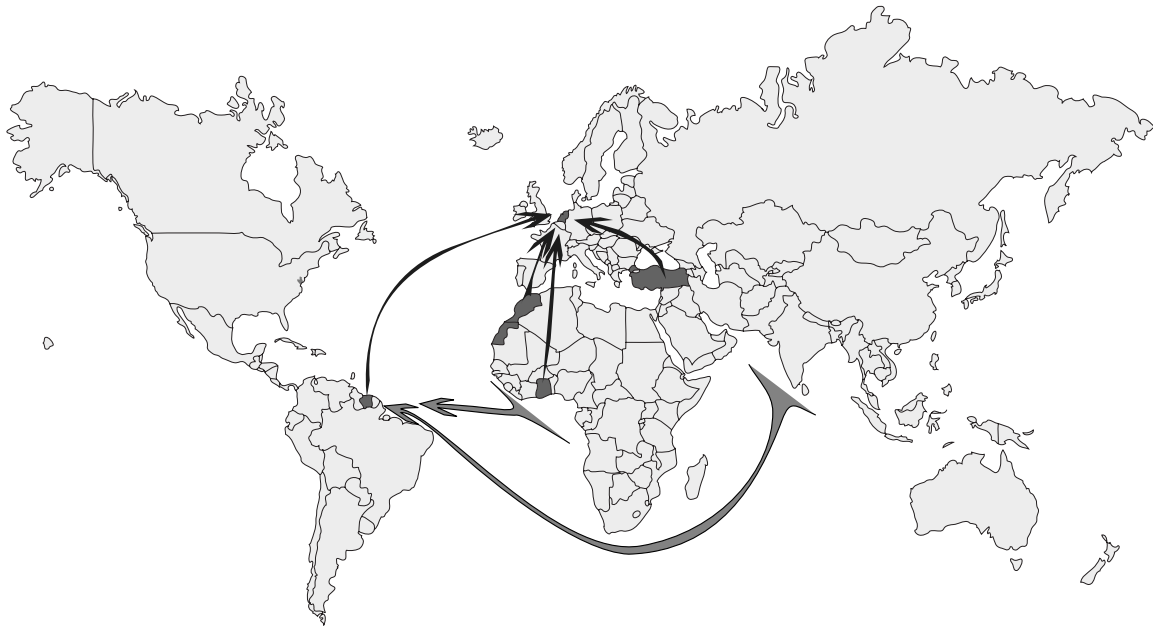

In the second half of the 20th century, descendants of West-African slaves (African Surinamese) and descendants of laborers from the Indian subcontinent (South-Asian Surinamese) migrated to the Netherlands. Dutch inhabitants of Turkish and Moroccan ethnic origin have a labor migration background and came in the sixties and seventies. Ghanaians migrated to the Netherlands in the eighties for multiple motives.



**Figure S2. Population pyramid.**

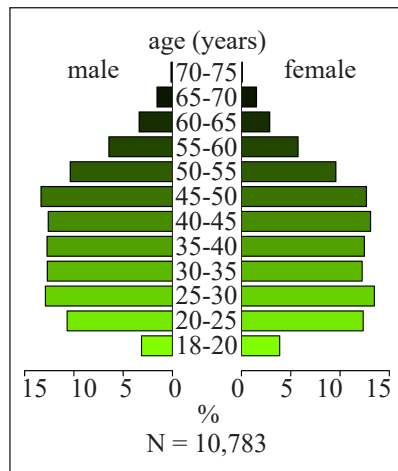

Age distribution separated by sex. Note the relatively high prevalence of younger subjects. Suriname is a former colony of the Netherlands. In the second half of the 20th century, descendants of West-African slaves (African Surinamese) and descendants of laborers from the Indian subcontinent (South-Asian Surinamese) migrated to the Netherlands.

**Figure S3. J-point amplitude of lead V4.**

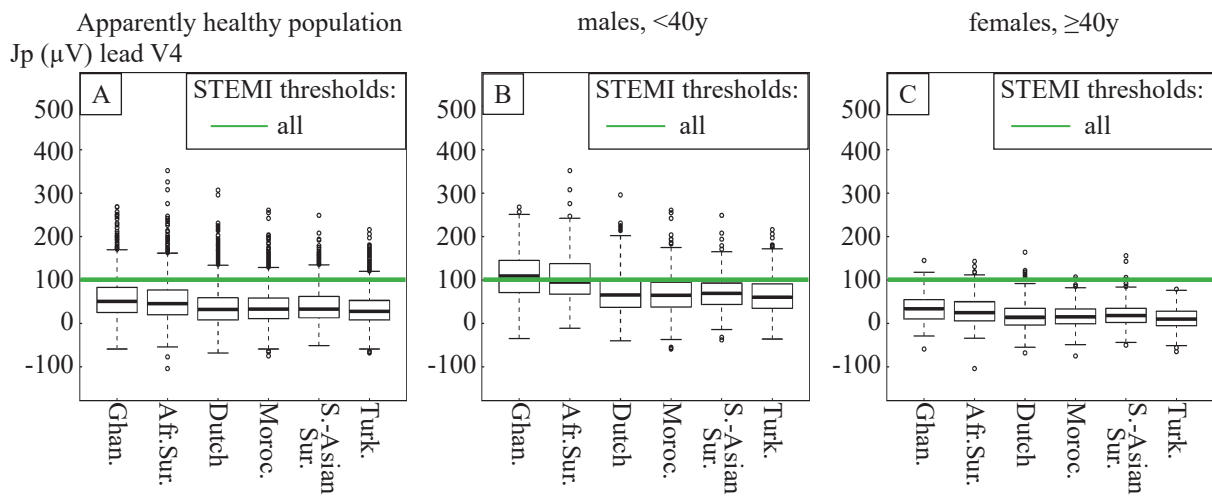

A: Boxplots of the J-point amplitudes of the 12 ECG leads in the apparently healthy population (N=10,783). B: Age and sex based subgroup with the highest STE-ECG prevalence (7.71%): males aged younger than 40 (n=2,127). C: Age and sex based subgroup with the lowest STE-ECG prevalence (0.39%): females 40 years or older (n=3055). The green line represents the current STEMI threshold. Ethnicities are ranked from the highest STE-ECG prevalence (left) to the lowest (right). Afr. Sur.=African Surinamese; F=female; Ghan.=Ghanaian; Jp=J-point; M=male; Maroc.=Moroccan; S.-Asian Sur.=South-Asian Surinamese; Turk.=Turkish ethnicity; y=years old.
